# Supplementary material for: Diet Breadth Affects Bacterial Identity but Not Diversity in the Pollen Provisions of Closely Related Polylectic and Oligolectic Bees
Source: MDPI journal article supplement (doi:10.3390/insects11090645), 2020-09-20
Supplement: s1 [file s1]

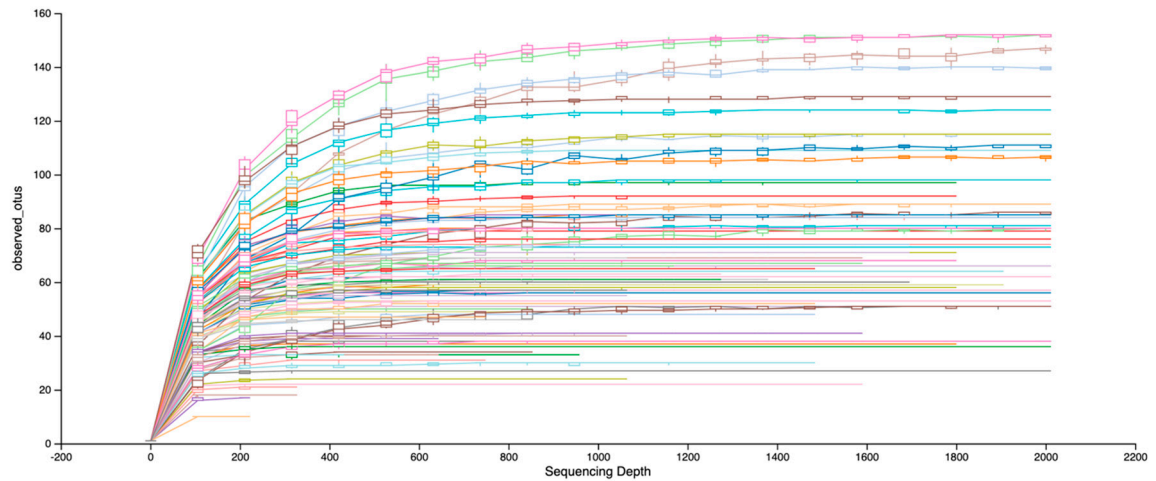

**Figure S1.** Rarefaction analyses for each sample. We obtained representative sequencing coverage at a read depth of 799 reads per sample.

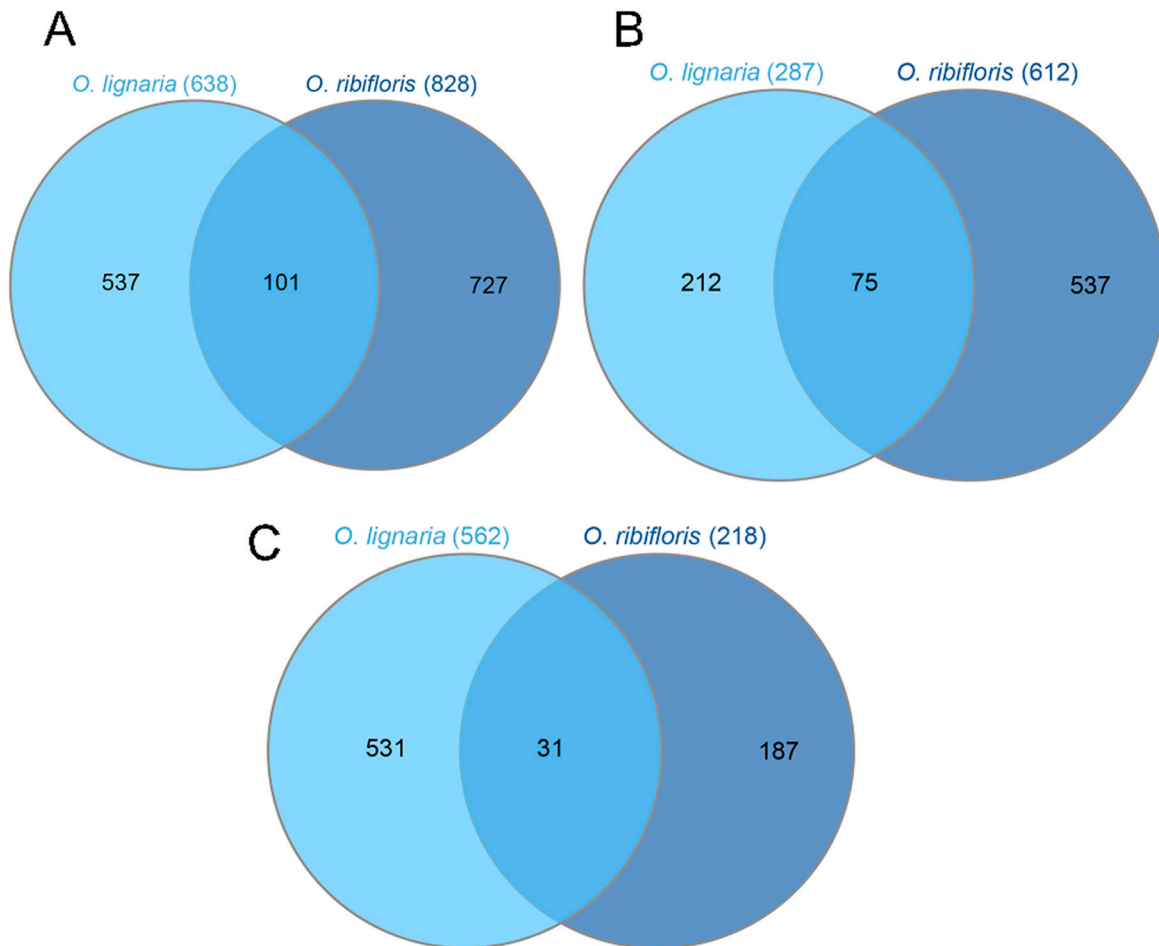

**Figure S2.** Unique and shared ASVs at greater than 0.01% overall abundance for each bee species separated by sampling site. Panels A–C corresponds to Site 1–3 respectively. Site 4 did not have any *Osmia ribifloris* present, so it is not shown here.

**Table S1.** Sample sizes of *Osmia* spp. collected at each sampling site.

| Site   | <i>Osmia lignaria</i> Collected | <i>Osmia ribifloris</i> Collected |
|--------|---------------------------------|-----------------------------------|
| Site 1 | 16                              | 21                                |
| Site 2 | 4                               | 21                                |
| Site 3 | 15                              | 6                                 |
| Site 4 | 12                              | 0                                 |

**Table S2.** Alpha diversity statistics for the microbial communities based on species and site comparisons with the full ASV table and a sampling depth of 799 reads per sample. When removing ASVs at <0.01% abundance and using a read depth of 501, alpha diversity was still not significantly different by bee species ( $H = 0.92$ ,  $p = 0.34$ ), sampling site overall ( $H = 2.22$ ,  $p = 0.53$ ), or pairwise between sites ( $p_{\text{adj}} > 0.05$  for each).

| Categorical Comparison                           | Shannon ( $\alpha$ Diversity) |                  |
|--------------------------------------------------|-------------------------------|------------------|
|                                                  | H                             | $p_{\text{adj}}$ |
| <i>Osmia ribifloris</i> vs <i>Osmia lignaria</i> | 1.76                          | 0.18             |
| All Sites Overall                                | 1.42                          | 0.70             |
| Site 1 vs Site 2                                 | 0.22                          | 0.78             |
| Site 1 vs Site 3                                 | 0.02                          | 0.88             |
| Site 1 vs Site 4                                 | 1.29                          | 0.78             |
| Site 2 vs Site 3                                 | 0.31                          | 0.78             |
| Site 2 vs Site 4                                 | 0.21                          | 0.78             |
| Site 3 vs Site 4                                 | 1.02                          | 0.78             |

**Table S3.** Beta diversity statistics of data with ASVs at <0.01% overall abundance removed, and a sampling depth of 501 reads per sample.

| Comparison        | Bray-Curtis |          | Unweighted UniFrac |          | Weighted UniFrac |          |
|-------------------|-------------|----------|--------------------|----------|------------------|----------|
|                   | F           | <i>p</i> | F                  | <i>p</i> | F                | <i>p</i> |
| Species           | 1.25        | 0.005    | 2.04               | 0.002    | 3.18             | 0.01     |
| Site              | 1.12        | 0.018    | 1.39               | 0.003    | 1.48             | 0.042    |
| Species x Site    | 1.00        | 0.45     | 1.05               | 0.36     | 1.11             | 0.31     |
| Straw within Site | 1.02        | 0.23     | 1.01               | 0.46     | 1.12             | 0.27     |

**Table S4.** Wald scores of significantly differentially abundant bacterial families as analyzed by ANCOM between sites or bee species.

| Comparison Across All Sites            |            | Comparison Across Bee Species |            |
|----------------------------------------|------------|-------------------------------|------------|
| Bacterial Family                       | Wald Score | Bacterial Family              | Wald Score |
| Unknown family, order Gaiellales       | 11         | Micrococcaceae                | 18         |
| Nitrosomonadaceae                      | 11         |                               |            |
| Micrococcaceae                         | 9          |                               |            |
| Rhodobacteraceae                       | 8          |                               |            |
| Sphingomonadaceae                      | 6          |                               |            |
| Nocardiodaceae                         | 5          |                               |            |
| Sphingobacteriaceae                    | 4          |                               |            |
| Caulobacteraceae                       | 3          |                               |            |
| Lactobacillaceae                       | 3          |                               |            |
| Unknown family, order Acidimicrobiales | 3          |                               |            |
| Cytophagaceae                          | 2          |                               |            |
| Oxalobacteraceae                       | 2          |                               |            |
| Unknown family, order Xanthomonadales  | 2          |                               |            |
| Methylobacteriaceae                    | 2          |                               |            |
| Geodermatophilaceae                    | 2          |                               |            |
| Flavobacteriaceae                      | 2          |                               |            |
| Comamonadaceae                         | 1          |                               |            |
| JG34-KF-161, order Sphingomonadales    | 1          |                               |            |
| Propionibacteriaceae                   | 1          |                               |            |

|                  |   |
|------------------|---|
| Mycobacteriaceae | 1 |
| Burkholderiaceae | 1 |

---
